# Supplementary material for: Disease-Associated Mutations That Alter the RNA Structural Ensemble
Source: PubMed Central journal article supplement (PMC2924325; doi:10.1371/journal.pgen.1001074), 2010-08-19
Supplement: pgen.1001074.s002.pdf [file pgen.1001074.s002.pdf]

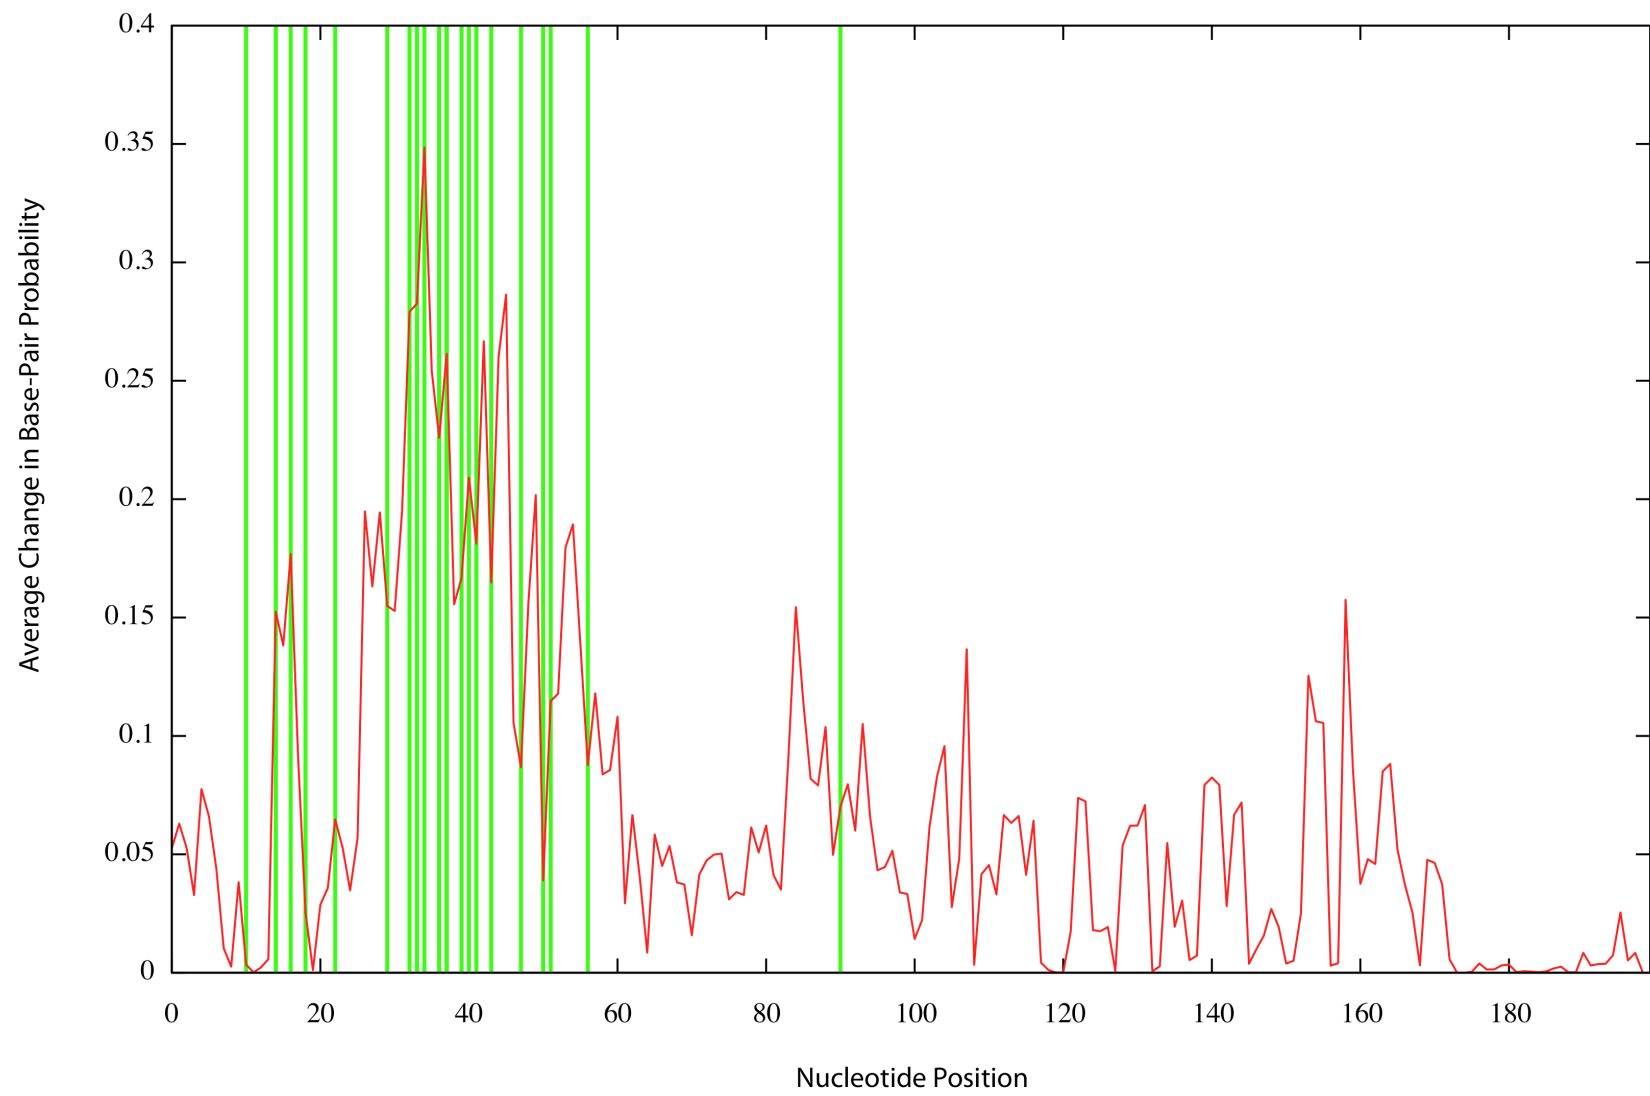

Figure S2
