# Supplementary material for: Disease-Associated Mutations That Alter the RNA Structural Ensemble
Source: PubMed Central journal article supplement (PMC2924325; doi:10.1371/journal.pgen.1001074), 2010-08-19
Supplement: pgen.1001074.s005.pdf [file pgen.1001074.s005.pdf]

A)

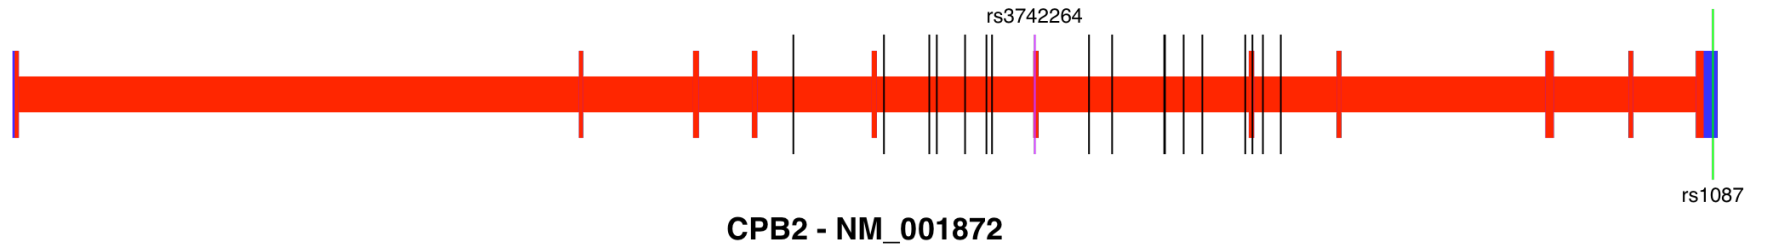

B)

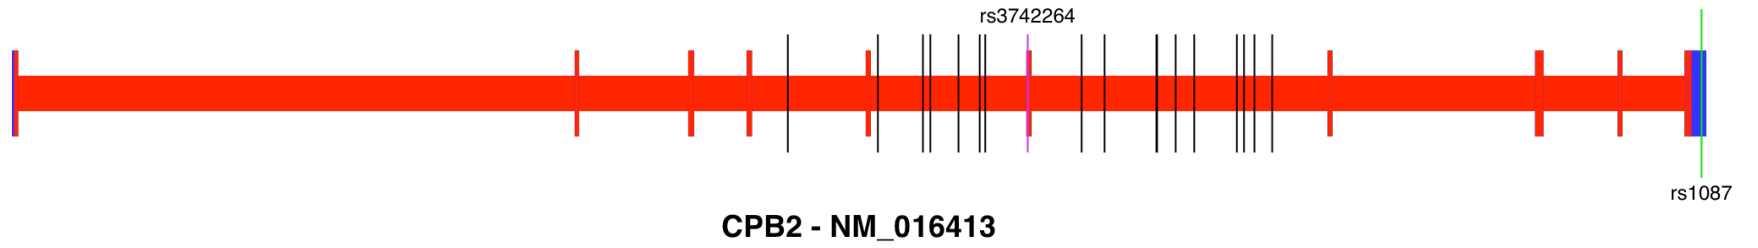

C)

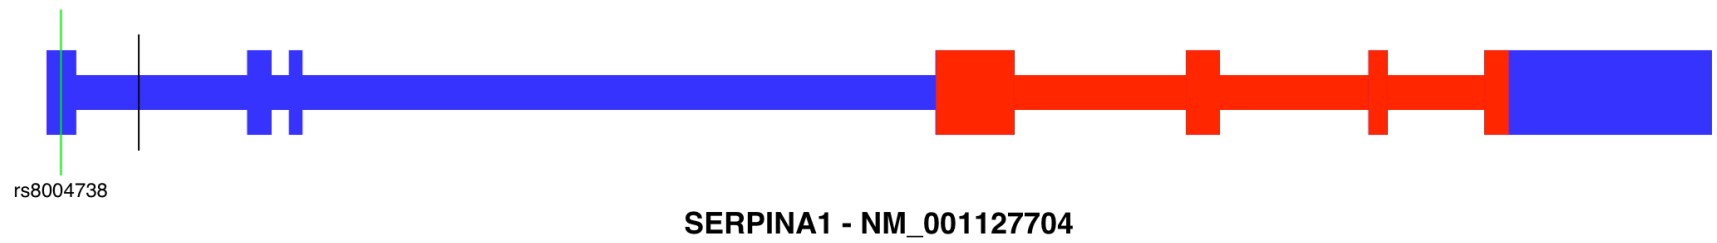

D)

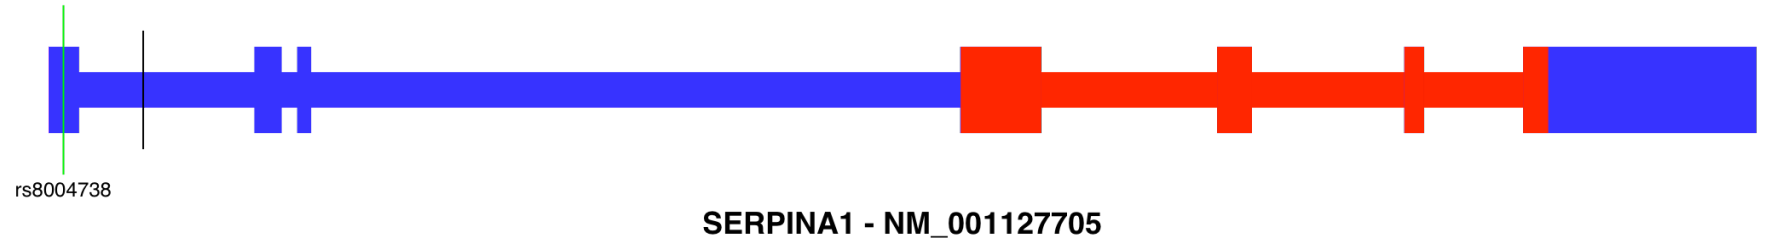

E)

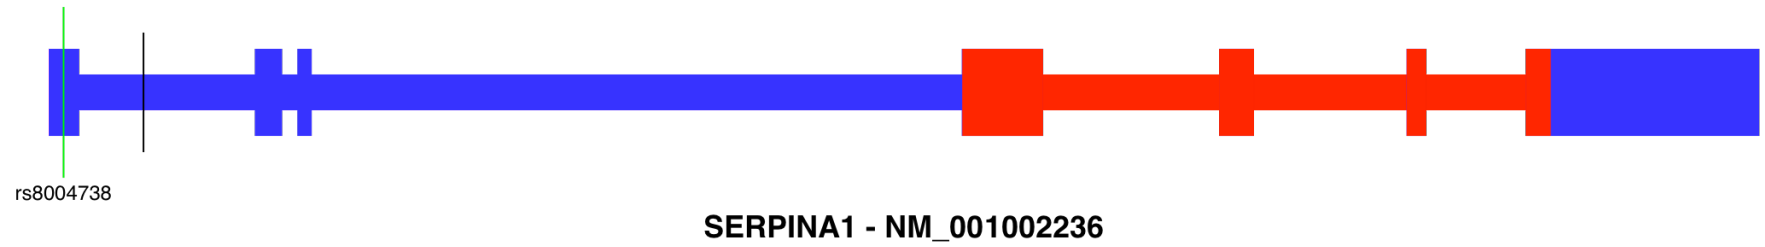

F)

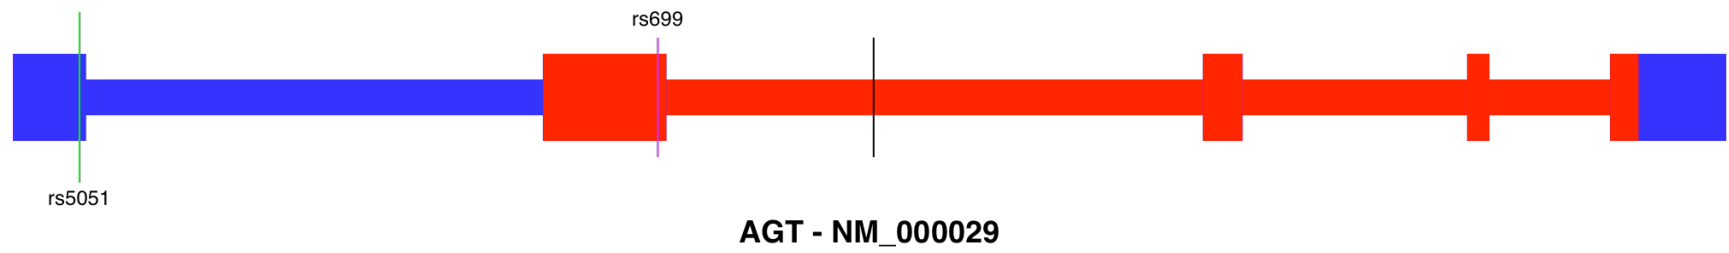

G)

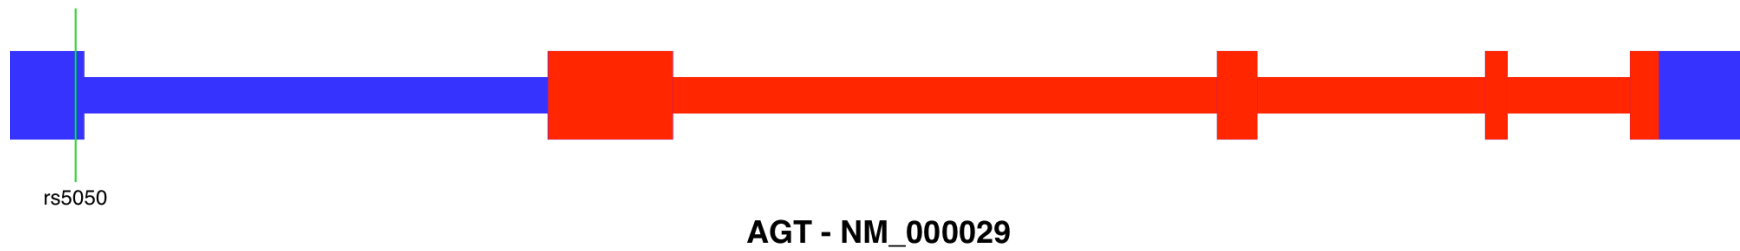

H)

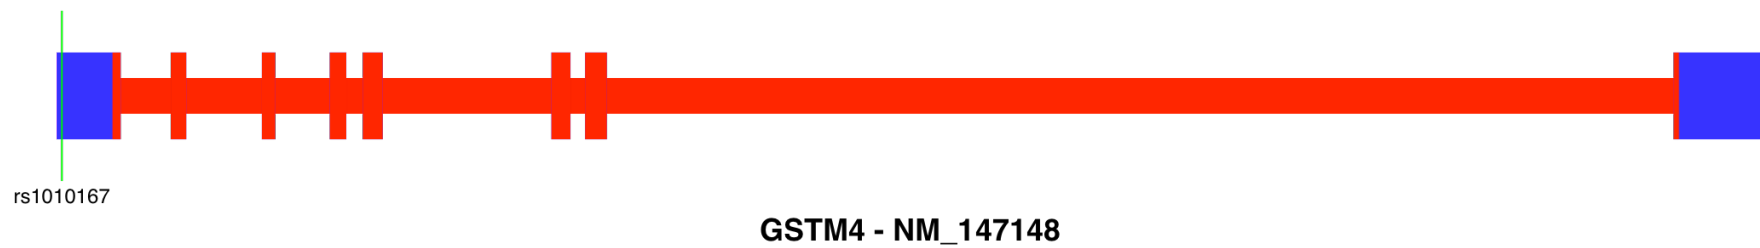

I)

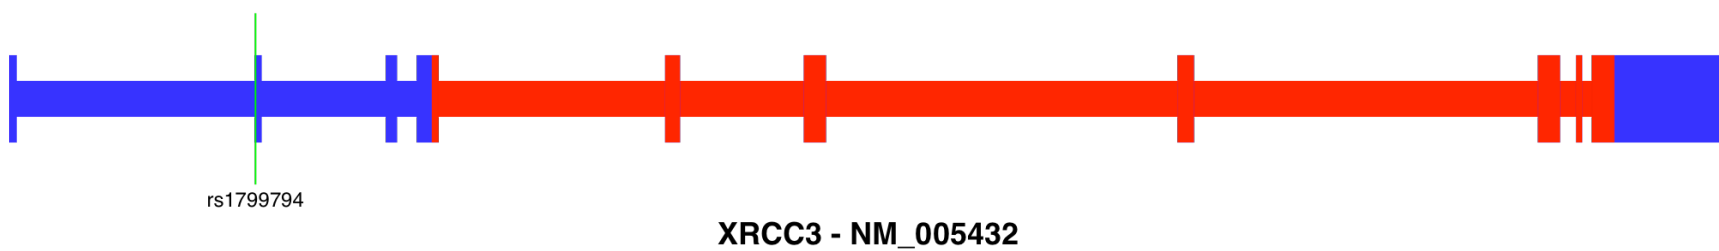

J)

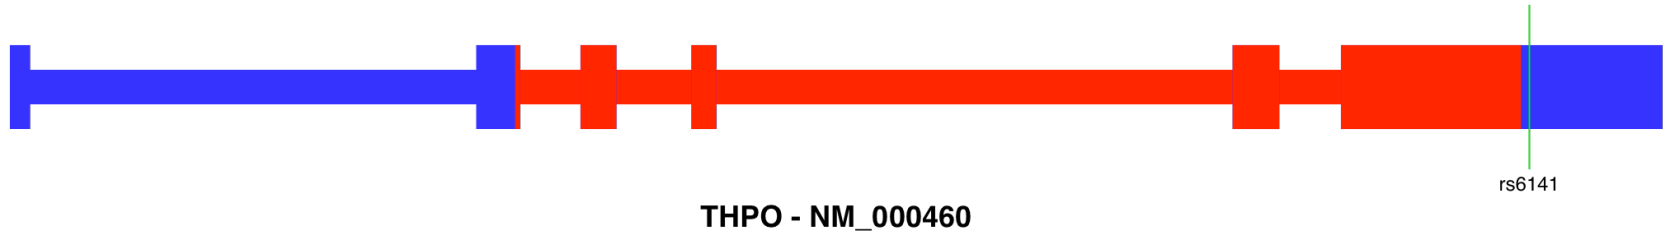

K)

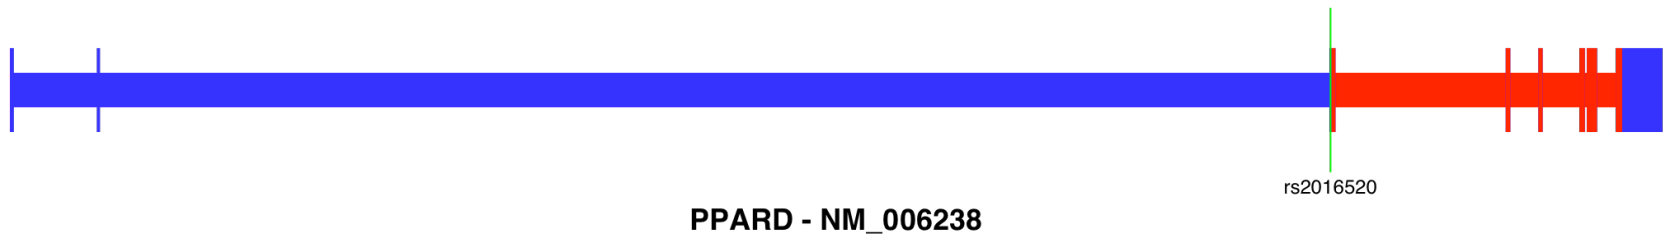

L)

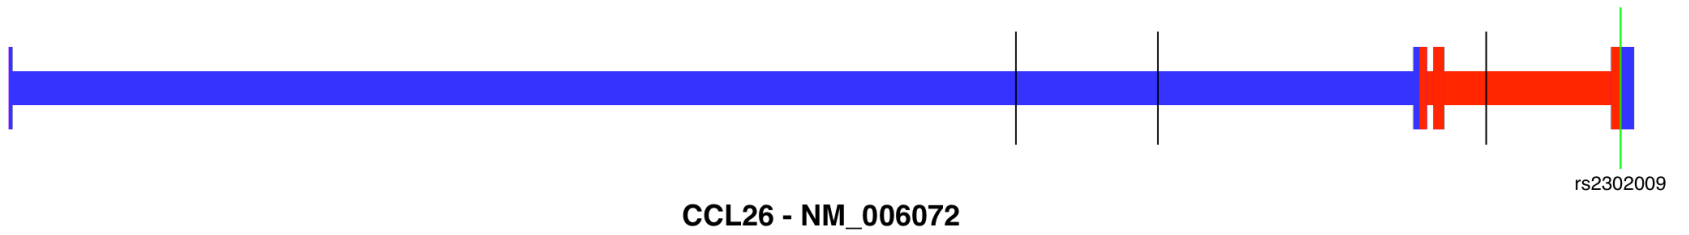

M)

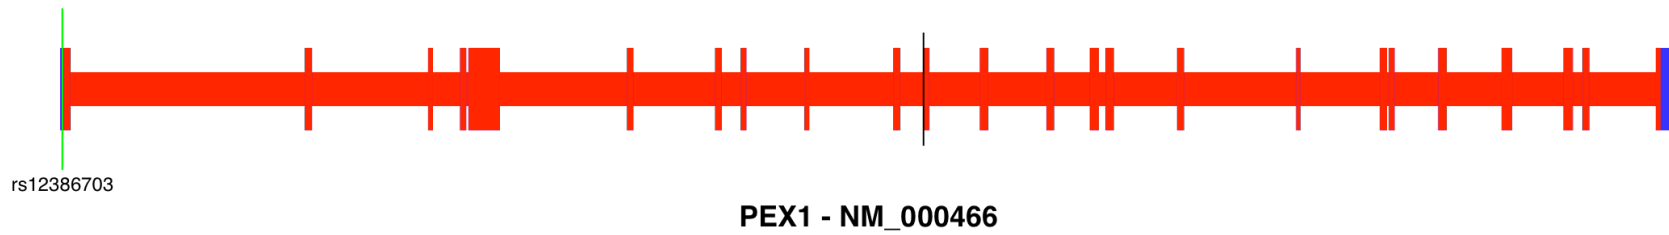

Figure S5
