# Supplementary material for: Disease-Associated Mutations That Alter the RNA Structural Ensemble
Source: PubMed Central journal article supplement (PMC2924325; doi:10.1371/journal.pgen.1001074), 2010-08-19
Supplement: pgen.1001074.s006.pdf [file pgen.1001074.s006.pdf]

Table S1: Disease states and phenotypes in which one associated SNP was found to alter the structural ensemble of the RNA.

| Disease                                           | Gene   | HGMD Acc. # | UTR | UTR length | mutation | Corr. Coeff | P-value | pmid     | reference | Motifs <sup>1</sup> | RBP <sup>2</sup> Binding | dbSNP <sup>3</sup> Ref. ID |
|---------------------------------------------------|--------|-------------|-----|------------|----------|-------------|---------|----------|-----------|---------------------|--------------------------|----------------------------|
| Loss of protection against HIV infection          | CCR5   | CR084787    | 5   | 357        | G310A    | 0.665       | 0.005   | 18094161 | [1]       | uORF, MBE 2X        | -                        | -                          |
| Hirschprung Disease                               | RET    | CR033995    | 5   | 190        | G154C    | 0.617       | 0.018   | 14633923 | [2]       | -                   | ELAVL1, PABPC1           | -                          |
| Change in Detoxification ability                  | GSTM4  | CR040571    | 5   | 314        | C30G     | 0.406       | 0.018   | 15128050 | [3]       | -                   | PABPC1, IGFBP2           | rs1010167*                 |
| Epith. ovarian cancer, serous type, prot., assoc. | XRCC3  | CR057423    | 5   | 380        | A65G     | 0.601       | 0.022   | 15924337 | [4]       | IRES, uORF 2X       | -                        | rs1799794*                 |
| Allergy, assoc. with                              | RNASE3 | CR067512    | 3   | 179        | G16C     | 0.789       | 0.024   | 16434694 | [5]       | PAS                 | -                        | rs2233860                  |
| Alzheimer disease, association with               | BDNF   | CR014434    | 5   | 346        | C301T    | 0.851       | 0.035   | 11244490 | [6]       | IRES, uORF 2X       | ELAVL1, PABPC1           | rs56164415                 |
| Increased triglyceride levels, association with   | ABCA1  | CR025352    | 5   | 313        | C35G     | 0.566       | 0.036   | 11940086 | [7]       | -                   | ELAVL1, PABPC1           | -                          |
| Glaucoma, primary congenital                      | CYP1B1 | CR032431    | 5   | 402        | C118T    | 0.675       | 0.037   | 12598442 | [8]       | uORF                | -                        | -                          |
| Reduced promoter activity, association with       | AGRP   | CR073538    | 5   | 300        | G79A     | 0.585       | 0.052   | 17180153 | [9]       | -                   | ELAVL1                   | rs34018897                 |
| Myocardial infarction, association with           | THPO   | CR014438    | 3   | 528        | G35A     | 0.867       | 0.053   | 11257273 | [10]      | IRES, K-BOX, uORF   | -                        | rs6141*                    |
| Parkinson disease, autosomal recessive            | PARK2  | CR024270    | 5   | 134        | G114T    | 0.504       | 0.067   | 11971093 | [11]      | -                   | ELAVL1                   | -                          |
| Hypercholesterolaemia                             | LDLR   | CR973644    | 5   | 168        | C23A     | 0.745       | 0.083   | 9259195  | [12]      | uORF                | -                        | -                          |
| Increased LDL cholesterol, association with       | PPARD  | CR035869    | 5   | 309        | C223T    | 0.804       | 0.085   | 12615676 | [13]      | uORF 2X             | ELAVL1                   | rs2016520*                 |
| Cowden's disease                                  | PTEN   | CR032089    | 5   | 1032       | G268A    | 0.867       | 0.087   | 12844284 | [14]      | uORF,GYB OX,TOP     | -                        | -                          |
| Eosinophilic oesophagitis, association with       | CCL26  | CR066323    | 3   | 169        | T13G     | 0.679       | 0.097   | 16453027 | [15]      | IRES, PAS           | ELAVL1, PABPC1           | rs2302009*                 |
| Alleviation of zellweger syndrome                 | PEX1   | CR053503    | 5   | 96         | C44G     | 0.818       | 0.097   | 16088892 | [16]      | IRES                | ELAVL1                   | rs12386703*                |

<sup>1</sup>Structural and sequence motifs identified in mRNA UTRs using UTRScan[17].

<sup>2</sup>RNA Binding Protein as determined by RIP-chip[18].

<sup>3</sup>dbSNP reference IDs for common variants. A star (\*) indicates LD data is available and reported in Supplementary Figure S6.

1. Jin Q, Agrawal L, Meyer L, Tubiana R, Theodorou I, et al. (2008) CCR5Delta32 59537-G/A promoter polymorphism is associated with low translational efficiency and the loss of CCR5Delta32 protective effects. *J Virol* 82: 2418-2426.
2. Garcia-Barcelo M, Sham MH, Lee WS, Lui VC, Chen BL, et al. (2004) Highly recurrent RET mutations and novel mutations in genes of the receptor tyrosine kinase and endothelin receptor B pathways in Chinese patients with sporadic Hirschsprung disease. *Clin Chem* 50: 93-100.
3. Guy CA, Hoogendoorn B, Smith SK, Coleman S, O'Donovan MC, et al. (2004) Promoter polymorphisms in glutathione-S-transferase genes affect transcription. *Pharmacogenetics* 14: 45-51.
4. Auranen A, Song H, Waterfall C, Dicioccio RA, Kuschel B, et al. (2005) Polymorphisms in DNA repair genes and epithelial ovarian cancer risk. *Int J Cancer* 117: 611-618.
5. Jonsson UB, Bystrom J, Stalenheim G, Venge P (2006) A (G->C) transversion in the 3' UTR of the human ECP (eosinophil cationic protein) gene correlates to the cellular content of ECP. *J Leukoc Biol* 79: 846-851.
6. Kunugi H, Ueki A, Otsuka M, Isse K, Hirasawa H, et al. (2001) A novel polymorphism of the brain-derived neurotrophic factor (BDNF) gene associated with late-onset Alzheimer's disease. *Mol Psychiatry* 6: 83-86.
7. Zwarts KY, Clee SM, Zwinderman AH, Engert JC, Singaraja R, et al. (2002) ABCA1 regulatory variants influence coronary artery disease independent of effects on plasma lipid levels. *Clin Genet* 61: 115-125.
8. Ohtake Y, Tanino T, Suzuki Y, Miyata H, Taomoto M, et al. (2003) Phenotype of cytochrome P4501B1 gene (CYP1B1) mutations in Japanese patients with primary congenital glaucoma. *Br J Ophthalmol* 87: 302-304.
9. Sozen MA, de Jonge LH, Greenway F, Ravussin E, Smith SR, et al. (2007) A rare mutation in AgRP, +79G>A, affects promoter activity. *Eur J Clin Nutr* 61: 809-812.
10. Webb KE, Martin JF, Hamsten A, Eriksson P, Iacoviello L, et al. (2001) Polymorphisms in the thrombopoietin gene are associated with risk of myocardial infarction at a young age. *Atherosclerosis* 154: 703-711.
11. Hedrich K, Marder K, Harris J, Kann M, Lynch T, et al. (2002) Evaluation of 50 probands with early-onset Parkinson's disease for Parkin mutations. *Neurology* 58: 1239-1246.
12. Day IN, Whittall RA, O'Dell SD, Haddad L, Bolla MK, et al. (1997) Spectrum of LDL receptor gene mutations in heterozygous familial hypercholesterolemia. *Hum Mutat* 10: 116-127.
13. Skogsberg J, Kannisto K, Cassel TN, Hamsten A, Eriksson P, et al. (2003) Evidence that peroxisome proliferator-activated receptor delta influences cholesterol metabolism in men. *Arterioscler Thromb Vasc Biol* 23: 637-643.
14. Zhou XP, Waite KA, Pilarski R, Hampel H, Fernandez MJ, et al. (2003) Germline PTEN promoter mutations and deletions in Cowden/Bannayan-Riley-Ruvalcaba syndrome result in aberrant PTEN protein and dysregulation of the phosphoinositol-3-kinase/Akt pathway. *Am J Hum Genet* 73: 404-411.
15. Blanchard C, Wang N, Stringer KF, Mishra A, Fulkerson PC, et al. (2006) Eotaxin-3 and a uniquely conserved gene-expression profile in eosinophilic esophagitis. *J Clin Invest* 116: 536-547.
16. Maxwell MA, Leane PB, Paton BC, Crane DI (2005) Novel PEX1 coding mutations and 5' UTR regulatory polymorphisms. *Hum Mutat* 26: 279.

17. Huang HY, Chien CH, Jen KH, Huang HD (2006) RegRNA: an integrated web server for identifying regulatory RNA motifs and elements. *Nucleic Acids Res* 34: W429-434.
18. Baroni TE, Chittur SV, George AD, Tenenbaum SA (2008) Advances in RIP-chip analysis : RNA-binding protein immunoprecipitation-microarray profiling. *Methods Mol Biol* 419: 93-108.
