# Supplementary material for: Disease-Associated Mutations That Alter the RNA Structural Ensemble
Source: PubMed Central journal article supplement (PMC2924325; doi:10.1371/journal.pgen.1001074), 2010-08-19
Supplement: pgen.1001074.s008.pdf [file pgen.1001074.s008.pdf]

Table S3

| Disease                                           | Gene     | HGMD Acc. #          | UTR | Length            | SNP            | dbSNP Ref. ID            | eQTL                                          |
|---------------------------------------------------|----------|----------------------|-----|-------------------|----------------|--------------------------|-----------------------------------------------|
| Alteration of plasma zymogen TAFI concentration   | CPB2     | CR080756             | 3   | 427<br>453        | T310A<br>T336A | rs1087                   | -                                             |
| Chronic obstructive pulmonary disease             | SERPINA1 | CR061339             | 5   | 533<br>554<br>551 | C116T          | rs8004738                | -                                             |
| $\beta$ -Thalassemia                              | HBB      | CR900265             | 3   | 132               | A111G          | rs63751128               | -                                             |
|                                                   |          | CR880076<br>CR961734 | 5   | 50                | A113G<br>C33G  | rs33985472<br>rs34135787 | -<br>-                                        |
| Hypertension                                      | AGT      | CR971935<br>CR973338 | 5   | 508               | G465A<br>A451C | rs5051<br>rs5050         | -<br>Acts in cis w/ AGT,<br>score=5.903, [20] |
| Change in Detoxification ability                  | GSTM4    | CR040571             | 5   | 314               | C30G           | rs1010167                | Acts in cis w/ GSTM4,<br>score =6.0734, [21]  |
| Epith. ovarian cancer, serous type, prot., assoc. | XRCC3    | CR057423             | 5   | 380               | A65G           | rs1799794                | -                                             |
| Allergy, assoc. with                              | RNASE3   | CR067512             | 3   | 179               | G16C           | rs2233860                | -                                             |
| Alzheimer disease, association with               | BDNF     | CR014434             | 5   | 346               | C301T          | rs56164415               | -                                             |
| Reduced promoter activity, association with       | AGRP     | CR073538             | 5   | 300               | G79A           | rs34018897               | -                                             |
| Myocardial infarction, association with           | THPO     | CR014438             | 3   | 528               | G35A           | rs6141                   | -                                             |
| Increased LDL cholesterol, association with       | PPARD    | CR035869             | 5   | 309               | C223T          | rs2016520                | -                                             |
| Eosinophilic oesophagitis, association with       | CCL26    | CR066323             | 3   | 169               | T13G           | rs2302009                | -                                             |
| Alleviation of zellweger syndrome                 | PEX1     | CR053503             | 5   | 96                | C44G           | rs12386703               | -                                             |
